# Supplementary material
Source: PubMed Central journal article supplement (PMC6059979)
Supplement: NIHMS974901-supplement-1.pdf [file NIHMS974901-supplement-1.pdf]

## Supporting Information

### Lipidated $\alpha/\alpha$ -AA heterogeneous peptides as antimicrobial agents

Sylvia Singh, Alekhya Nimmagadda, Ma Su, Minghui Wang, Peng Teng and Jianfeng Cai

Department of Chemistry, University of South Florida, 4202 East Fowler Avenue, Tampa,

Florida 33620, United States

#### HPLC DATA

| Compound Name                       | Retention Time |
|-------------------------------------|----------------|
| C <sub>16</sub> -K-BB <sub>3</sub>  | 24.2154        |
| C <sub>16</sub> -K-BB <sub>2</sub>  | 25.8474        |
| C <sub>16</sub> -K-BB <sub>1</sub>  | 26.6709        |
| C <sub>14</sub> -K-BB <sub>1</sub>  | 24.1858        |
| C <sub>12</sub> -K-BB <sub>1</sub>  | 22.0125        |
| C <sub>10</sub> -K-BB <sub>1</sub>  | 19.5734        |
| C <sub>8</sub> -K-BB <sub>1</sub>   | 17.0797        |
| C <sub>6</sub> -K-BB <sub>1</sub>   | 14.2120        |
| C <sub>16</sub> -K-RBB <sub>3</sub> | 59.8482        |
| C <sub>16</sub> -K-RBB <sub>2</sub> | 26.8863        |
| C <sub>16</sub> -K-RBB <sub>1</sub> | 27.6704        |
| C <sub>16</sub> -BB <sub>1</sub>    | 34.8392        |
| C <sub>16</sub> -K-F-K              | 26.2337        |

**Table S1: HPLC retention time**

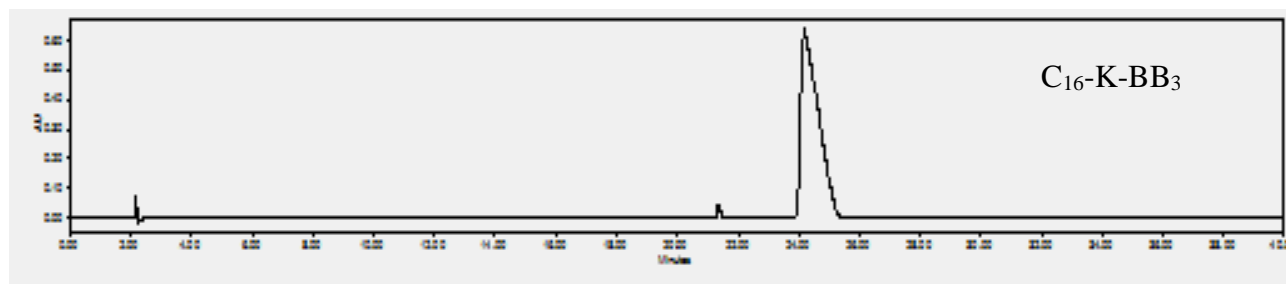

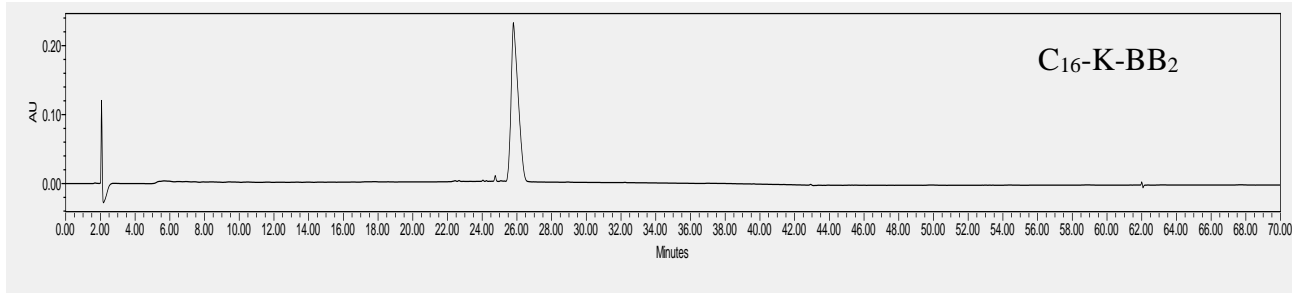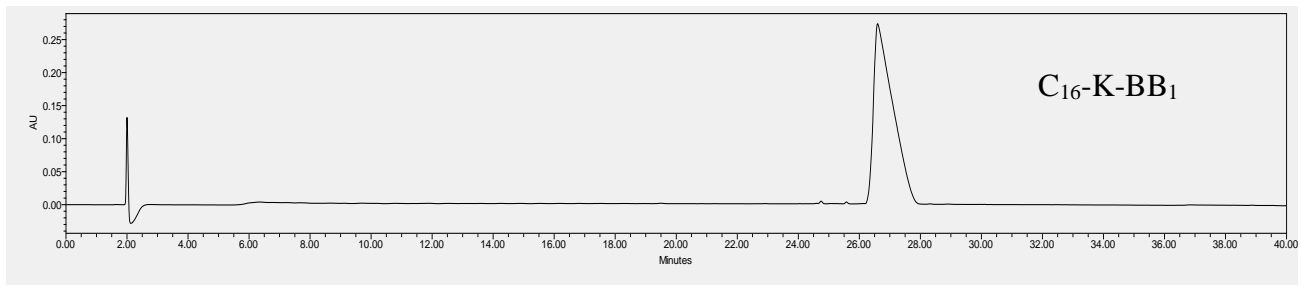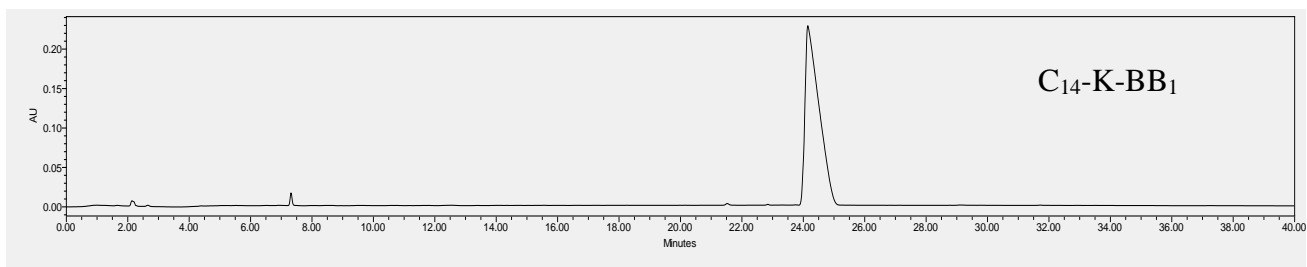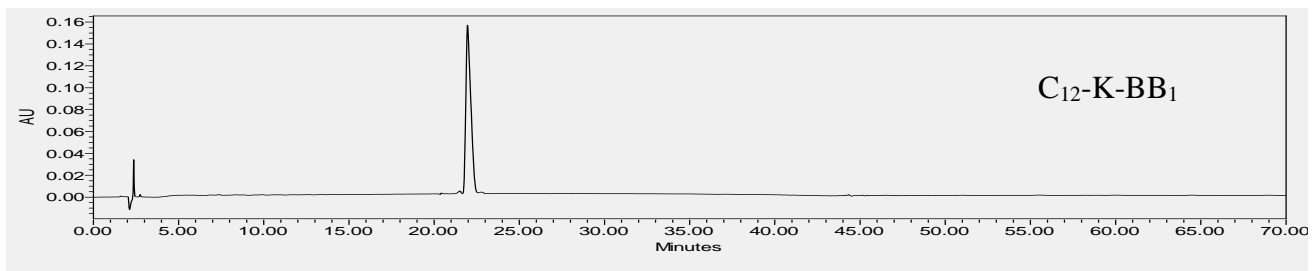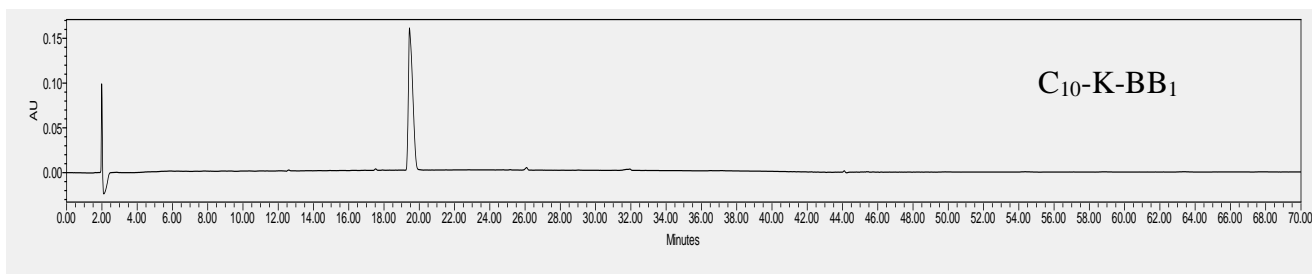

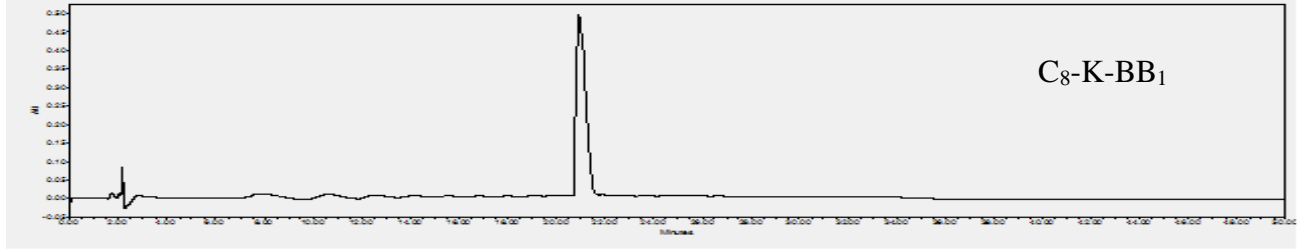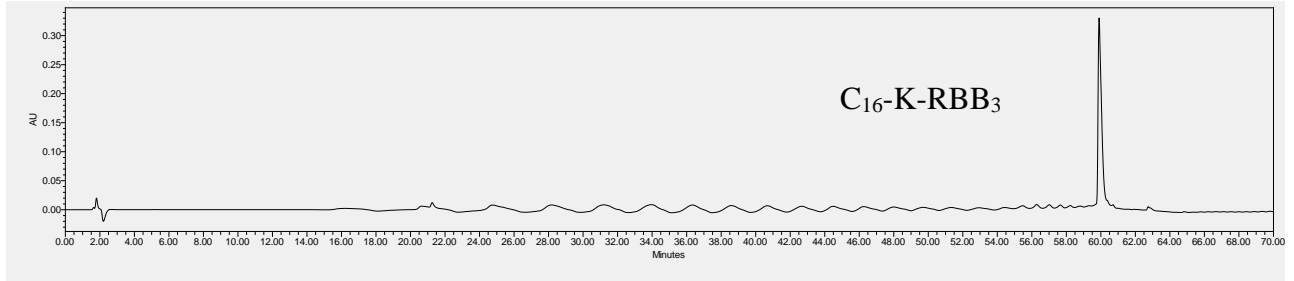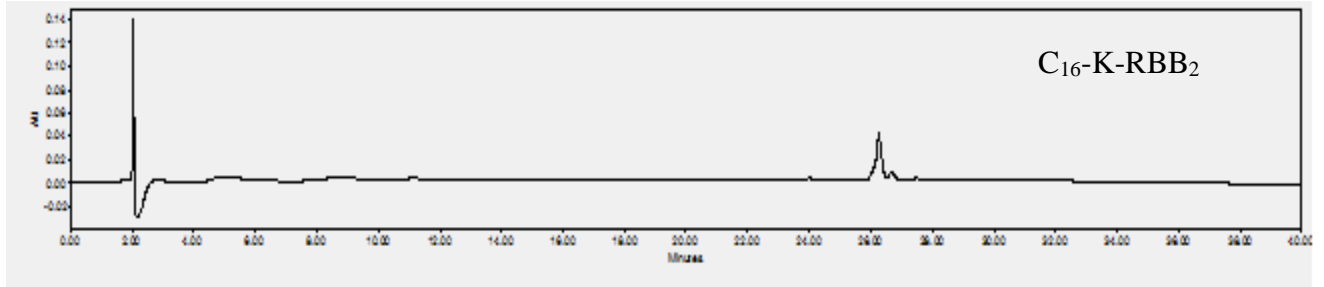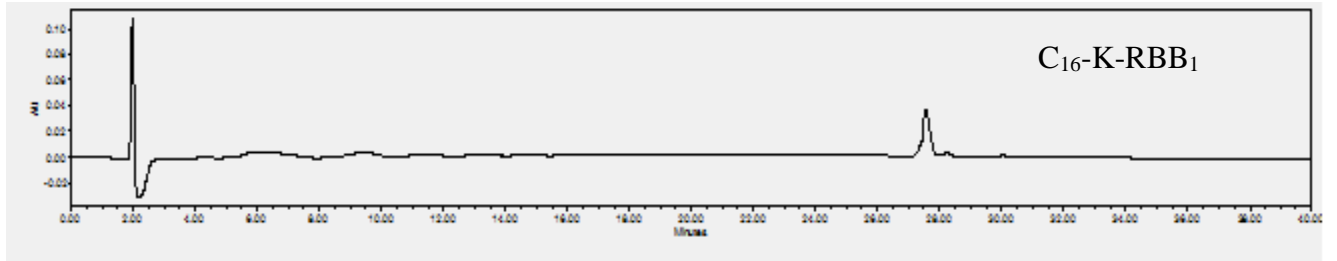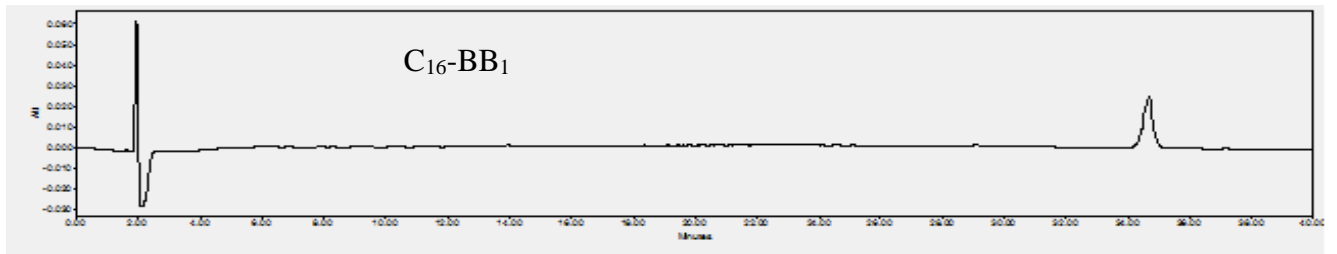

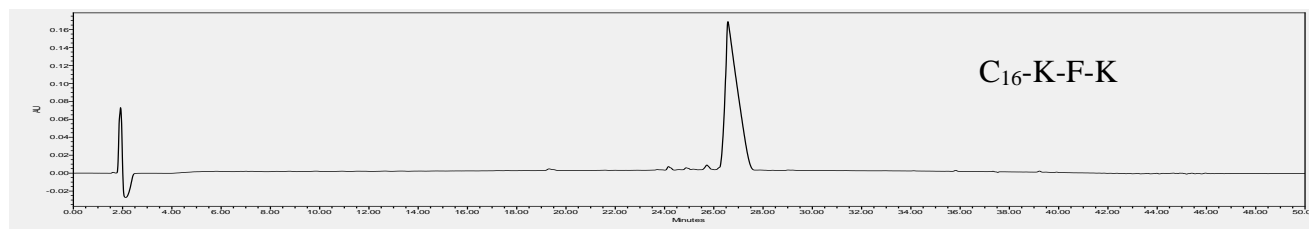

**Figure S1: HPLC Spectra showing purity and retention time of all compounds synthesized**

**Matrix Assisted Laser Desorption/Ionization- Time of Flight (MALDI-TOF)**

| <b>Compound Name</b>                | <b>MW (M+H)<sup>+</sup></b> | <b>MW (Theoretical)</b> |
|-------------------------------------|-----------------------------|-------------------------|
| C <sub>16</sub> -K-BB <sub>3</sub>  | 1295.02                     | 1293.84                 |
| C <sub>16</sub> -K-BB <sub>2</sub>  | 991.77                      | 990.43                  |
| C <sub>16</sub> -K-BB <sub>1</sub>  | 688.53                      | 687.03                  |
| C <sub>14</sub> -K-BB <sub>1</sub>  | 660.56                      | 685.97                  |
| C <sub>12</sub> -K-BB <sub>1</sub>  | 632.51                      | 630.92                  |
| C <sub>10</sub> -K-BB <sub>1</sub>  | 604.50                      | 602.87                  |
| C <sub>8</sub> -K-BB <sub>1</sub>   | 576.45                      | 574.81                  |
| C <sub>6</sub> -K-BB <sub>1</sub>   | 548.43                      | 546.76                  |
| C <sub>16</sub> -K-RBB <sub>3</sub> | 1210.12                     | 1209.68                 |
| C <sub>16</sub> -K-RBB <sub>2</sub> | 936.50                      | 934.33                  |
| C <sub>16</sub> -K-RBB <sub>1</sub> | 659.60                      | 658.97                  |
| C <sub>16</sub> -BB <sub>1</sub>    | 560.48                      | 558.85                  |
| C <sub>16</sub> -K-F-K              | 659.60                      | 658.97                  |

**Table S2: Masses as Shown by MALDI-TOF and Theoretical Values**
